# Supplementary material
Source: publisher site journal article supplement (https://www.spandidos-publications.com/5267/downloadSupplementary)
Supplement: Supplementary file 1 [file downloadSupplementary]

## Sheet: Low_(Medium+High)_diffLab
Table SIII. Differentially expressed LncRNAs
ZNF213-AS1	logFC	AveExpr	t	P.Value
CTD-2510F5.4	-1.07228	2.4982	-3.03873	0.00253267
FAM83A-AS1	-0.922699	1.52218	-2.55775	0.0109053
LINC00511	-0.847869	1.80661	-3.35514	0.000869513
KIFC1	-0.772821	2.81138	-2.18977	0.0291216
LUCAT1	-0.67465	0.987824	-2.16831	0.0307275
AGAP2-AS1	-0.627242	2.31949	-2.15248	0.0319608
LINC01564	-0.623635	0.893577	-2.00227	0.0459342
LINC01116	-0.604051	0.839804	-2.07311	0.0388057
PVT1	-0.524525	1.75303	-2.11147	0.0353555
RP1-86C11.7	-0.508731	0.78613	-2.11543	0.035015
RP11-923I11.6	0.501832	0.867694	2.05072	0.0409492
AC009120.6	0.503432	1.16148	2.63899	0.00864228
CTB-36H16.2	0.504528	0.697239	4.10798	4.84828e-05
RP11-342D11.2	0.505003	0.29828	4.93511	1.18036e-06
AC090616.2	0.506837	1.06292	2.24579	0.0252663
FENDRR	0.509062	0.575774	2.70456	0.00713338
RP11-488L18.10	0.509417	2.87305	2.08345	0.037848
CTB-131B5.5	0.511952	0.394692	3.58689	0.000376337
CTA-223H9.9	0.512942	0.570566	3.79225	0.000172474
RP11-775D22.2	0.513311	0.720498	2.49193	0.0131116
SH3BP5-AS1	0.516583	1.396	2.40724	0.0165283
LINC00339	0.517595	3.5235	2.66919	0.00791498
RP11-334A14.8	0.522237	0.314486	2.60734	0.0094683
LINC00638	0.522451	0.973117	3.0972	0.00209219
RP11-408O19.5	0.524698	0.643104	2.76131	0.00602373
RP11-768F21.1	0.526086	0.714683	2.97127	0.00314584
RP11-1293J14.1	0.529498	0.774263	3.42448	0.00068006
RP11-505K9.1	0.529643	1.23858	2.23873	0.025726
AC034243.1	0.529753	0.568248	2.59516	0.00980463
RP3-402G11.28	0.534955	1.4518	2.31662	0.0210322
FMR1-IT1	0.535125	0.746899	3.48944	0.000538197
CTC-429P9.3	0.535766	2.02135	2.7517	0.00619988
CTC-429P9.2	0.536766	1.86663	2.67491	0.00778352
LINC01484	0.540657	0.403697	4.06675	5.74945e-05
RP11-304L19.13	0.543602	0.829992	3.87634	0.000124018
LA16c-380H5.5	0.544652	1.07983	2.28558	0.0228046
TMEM105	0.545657	0.911627	3.06205	0.00234762
CTD-2015H6.3	0.548503	2.65552	2.68258	0.00761037
PSMA3-AS1	0.549086	2.59629	2.59946	0.00968461
SEMA3B-AS1	0.550494	1.02509	2.69399	0.00735935
RP11-449P15.2	0.550801	0.912701	2.78191	0.00566127
RP11-295P9.12	0.550997	0.507003	4.13464	4.33911e-05
CTB-89H12.4	0.553158	1.78259	2.71208	0.00697645
LINC01186	0.554012	0.479652	3.96099	8.84487e-05
LINC00685	0.554826	1.33266	2.21745	0.0271568
RBPMS-AS1	0.557526	1.47286	2.0123	0.0448621
BCRP3	0.559181	0.582421	3.20236	0.00147275
CTC-498J12.1	0.562732	1.09413	2.4188	0.01602
RP5-1171I10.5	0.564088	1.14102	2.01178	0.0449172
RP11-96D1.6	0.56535	0.845322	2.97912	0.00306806
RP11-93B14.10	0.565534	1.33513	2.32985	0.0203139
LINC01426	0.571647	1.33463	2.41717	0.0160908
LINC01569	0.573003	1.31878	2.8628	0.00442138
RP11-46C24.7	0.574318	1.3018	3.76419	0.000192281
RP11-796E10.1	0.576174	0.733497	2.36799	0.0183625
NEBL-AS1	0.576708	0.716482	3.76782	0.000189605
RP5-1092A3.4	0.577575	1.05371	2.74495	0.00632641
RP3-368A4.6	0.581066	1.1541	3.27551	0.00114722
RP11-307B6.3	0.581419	0.294494	4.65027	4.51882e-06
RP11-566K19.6	0.581659	0.558229	2.56619	0.0106477
RP11-356C4.5	0.582951	0.603333	3.2078	0.00144586
MCCC1-AS1	0.585064	0.829591	3.26121	0.00120506
RP11-616M22.5	0.596162	0.750152	2.17461	0.030248
RP11-677M14.2	0.597037	0.633881	3.7772	0.000182844
LA16c-358B7.3	0.598898	0.985569	3.56864	0.000402661
RP1-179N16.6	0.599347	0.683781	3.79215	0.00017254
RP11-304F15.3	0.599576	0.895564	2.73901	0.00643974
CTD-2227E11.1	0.605148	1.19278	2.14872	0.0322595
LINC00858	0.607043	0.398862	3.20905	0.00143975
GS1-594A7.3	0.615445	0.281585	4.42755	1.2331e-05
RP11-714G18.1	0.617596	0.437544	4.65453	4.43126e-06
RP11-254F7.2	0.626418	2.0102	2.89702	0.00397548
RP11-345P4.9	0.62769	1.8489	3.1425	0.00180064
DICER1-AS1	0.630253	1.08925	3.53758	0.000451472
ITGB2-AS1	0.634906	1.52336	1.99227	0.0470252
RP11-116N8.4	0.647748	0.383515	3.10394	0.0020462
ZNF213-AS1	0.65504	1.51992	4.07078	5.65478e-05
CTD-3032H12.2	0.65564	0.571178	3.86812	0.000128118
RP11-330A16.1	0.659715	0.509308	2.99383	0.00292711
RP11-93B14.9	0.665991	1.8741	2.41743	0.0160795
MIR503HG	0.676027	1.00776	2.71667	0.00688222
RP11-334C17.5	0.676479	1.26407	2.96594	0.00319968
LA16c-OS12.2	0.690751	1.0354	3.88552	0.000119588
RP1-78O14.1	0.693992	0.521152	3.61095	0.000344104
RP5-1021I20.1	0.698577	1.91373	3.13161	0.00186709
PSORS1C3	0.701519	0.875599	2.03133	0.0428865
CTD-2017F17.2	0.71086	1.23733	3.01119	0.00276834
RP11-469A15.2	0.730187	0.717654	2.55297	0.0110534
LINC00893	0.735256	0.754948	4.32301	1.94785e-05
RP11-228B15.4	0.741886	1.28922	3.2591	0.00121383
LINC00482	0.781947	1.25451	2.87102	0.00431033
RP11-612B6.2	0.78539	1.46987	3.65498	0.000291713
RP11-357D18.1	0.787661	0.7921	2.61448	0.00927591
AC003090.1	0.790329	0.240595	6.84307	2.9438e-11
RP11-196G11.5	0.801723	3.72923	3.54004	0.00044741
RP11-359M6.1	0.824365	0.566053	3.22637	0.00135752
RP11-497G19.1	0.842282	0.697776	2.04026	0.0419851
CRNDE	0.84637	2.92814	2.54994	0.0111485
RP11-320N7.2	0.850779	1.08975	2.21755	0.0271503
RP11-305L7.1	0.860949	1.04063	3.83569	0.000145562
COLCA1	0.866201	1.29538	2.46465	0.0141367
RP11-434E6.4	0.867139	1.03689	4.80853	2.16078e-06
AC137932.5	0.875508	1.58677	2.91266	0.00378577
RP11-483L5.1	0.875624	0.974867	2.624	0.00902498
GAS6-AS1	0.88844	0.735386	3.94509	9.42907e-05
CH17-340M24.3	0.903177	3.24718	3.51923	0.000482858
RP1-127H14.3	0.903483	0.509284	4.03865	6.4525e-05
RP11-95I16.6	0.9135	0.374554	3.92293	0.000103042
RP3-340B19.3	0.925609	0.711132	3.57387	0.000394954
RP11-338N10.3	0.931264	0.845151	3.56177	0.000413012
RP11-1055B8.4	0.934563	1.19255	3.08885	0.00215042
ASMTL-AS1	0.943602	1.72534	2.73275	0.00656112
LINC00261	0.962617	1.46374	2.39037	0.0172961
LINC00106	0.985016	1.68355	2.99481	0.00291793
RP11-259K15.2	0.988416	1.44522	2.57138	0.0104919
NEAT1	1.00618	4.58879	2.42995	0.0155426
C5orf38	1.00656	1.89279	2.27867	0.0232164
ADIRF-AS1	1.07344	0.913613	5.10898	5.03832e-07
RP11-66N24.6	1.07864	1.84033	2.15486	0.0317728
RP6-114E22.1	1.0966	0.606817	3.79778	0.000168803
AC026471.6	1.1595	1.1169	3.64996	0.000297284
RP11-326C3.2	1.1887	3.07724	1.96974	0.0495621
RP11-497G19.2	1.23775	0.692294	2.91683	0.00373662
PTCSC3	1.28234	1.35218	3.40242	0.000735695
RP11-635O16.2	1.29498	0.451707	6.87942	2.34467e-11
AC092071.1	1.34141	1.20806	3.39264	0.000761706
HAGLR	1.4884	2.8428	3.12142	0.00193127
SFTA3	1.51384	4.40614	2.74187	0.00638493
LINC01436	1.61874	2.01506	2.79578	0.00542855
SFTA1P	2.06415	3.57567	3.28537	0.00110883
